# Supplementary material
Source: PubMed Central journal article supplement (PMC10182476)
Supplement: NIHMS1891894-supplement-1.pdf [file NIHMS1891894-supplement-1.pdf]

**Supplementary Appendix ‘Clinical guideline on the management of pheochromocytoma and paraganglioma in patients harboring germline pathogenic variants in the succinate dehydrogenase subunit D gene’**

|                                                                                                          |                 |
|----------------------------------------------------------------------------------------------------------|-----------------|
| <b><u>SUPPLEMENTAL TABLE 1. TRANSIENT AND PERMANENT SIDE EFFECTS AFTER STEREOTACTIC RADIOSURGERY</u></b> | <b><u>2</u></b> |
| <b><u>SUPPLEMENTAL TABLE 2. SUMMARY OF CLINICAL STUDIES INVESTIGATING SYSTEMIC THERAPIES</u></b>         | <b><u>3</u></b> |
| <b><u>SUPPLEMENTAL TABLE 3: ADVERSE EFFECTS OF TARGETED INTERNAL RADIOTHERAPY</u></b>                    | <b><u>8</u></b> |
| <b><u>REFERENCES</u></b>                                                                                 | <b><u>9</u></b> |

**Supplemental Table 1.** Transient and permanent side effects after stereotactic radiosurgery

| Side effects               | CK<br>(transient) | CK<br>(permanent) | LINAC<br>(transient) | LINAC<br>(permanent) | Gamma Knife Surgery<br>(transient) | Gamma<br>Surgery<br>(permanent) | Knife |
|----------------------------|-------------------|-------------------|----------------------|----------------------|------------------------------------|---------------------------------|-------|
| N, V                       | 0%                | 0%                | 46.2%                | 0%                   | 2.1%                               | 0%                              |       |
| CN V                       | 0%                | 0%                | 0%                   | 0%                   | 6.5%                               | 0%                              |       |
| CN VII                     | 0%                | 0%                | 38.5%                | 0.1%                 | 10.8%                              | 0.57%                           |       |
| CN VIII (hearing<br>loss)  | 0%                | 0%                | 0%                   | 0.1%                 | 2.1%                               | 1.28%                           |       |
| CN X                       | 0%                | 0%                | 0%                   | 0%                   | 6.5%                               | 0.57%                           |       |
| CN XII                     | 0%                | 0%                | 15.3%                | 0%                   | 0%                                 | 0%                              |       |
| Total % of side<br>effects | 0.9%              | 0.1%              | 4.8%                 | 0.7%                 | 6.7%                               | 3%                              |       |

Side effects of stereotactic radiosurgery noted specifically for HNPGLs – adapted from Fatima et al., 2021.<sup>1</sup>

**Supplemental Table 2.** Summary of clinical studies investigating systemic therapies

| Author                                      | Therapy (retrospective study if not indicated otherwise)                                                                                  | Patient number (n) (disease status at treatment start)                                                                                                                                                                                                        | Complete response | Partial response                                                                                                                                                                                                                                                                                                        | Stable disease                                                   | Median overall survival (OS)/ progression free survival (PFS)/time to progression (TTP)                                                                                                                                                                                                     |
|---------------------------------------------|-------------------------------------------------------------------------------------------------------------------------------------------|---------------------------------------------------------------------------------------------------------------------------------------------------------------------------------------------------------------------------------------------------------------|-------------------|-------------------------------------------------------------------------------------------------------------------------------------------------------------------------------------------------------------------------------------------------------------------------------------------------------------------------|------------------------------------------------------------------|---------------------------------------------------------------------------------------------------------------------------------------------------------------------------------------------------------------------------------------------------------------------------------------------|
| Nastos et al., 2017 <sup>2</sup>            | [ <sup>90</sup> Y]/[ <sup>177</sup> Lu]-DOTATATE (PRRT) (2 patients with PGLs [ <sup>177</sup> Lu]-DOTATATE) vs. [ <sup>131</sup> I]-MIBG | N=22 patients, n=7 PHEOs, n=15 PGLs (n=5 <i>SDHB</i> , no <i>SDHD</i> )<br>n=9 [ <sup>90</sup> Y]/[ <sup>177</sup> Lu]-DOTATATE (n=1 PHEO, n=8 PGLs)<br>n=11 [ <sup>131</sup> I]-MIBG (n=6 PHEOs, n=5 PGLs), n=2 combination (n=2 PGLs) (not all progressive) |                   | Disease control rate (response plus stable disease) to several cycles of treatment: [ <sup>90</sup> Y]/[ <sup>177</sup> Lu]-DOTATATE 100% (13/13) vs. [ <sup>131</sup> I]-MIBG: 63% (10/16)<br><br>Sub-group PGLs: [ <sup>90</sup> Y]/[ <sup>177</sup> Lu]-DOTATATE 100% (13/13) vs. [ <sup>131</sup> I]-MIBG 50% (4/8) |                                                                  | OS/PFS [ <sup>90</sup> Y]/[ <sup>177</sup> Lu]-DOTATATE 60.8/38.5 months vs. OS/PFS [ <sup>131</sup> I]-MIBG 41.2/20.6 months<br><br>Sub-group PGLs: OS/PFS [ <sup>90</sup> Y]/[ <sup>177</sup> Lu]-DOTATATE 60.8/38.5 months vs. OS/PFS [ <sup>131</sup> I]-MIBG 22.8/14.4 months (p<0,05) |
| Imhof et al. 2011 <sup>3</sup>              | [ <sup>90</sup> Y] DOTATOC (phase II, prospective)                                                                                        | N=39 (n=11 PHEOs, n=28 PGLs) (all progressive disease), genetic results not provided                                                                                                                                                                          | ns                | 18%                                                                                                                                                                                                                                                                                                                     | ns                                                               | Mean OS in PHEO/PGL 32/82 months                                                                                                                                                                                                                                                            |
| Puranik et al., 2015 <sup>4</sup>           | [ <sup>90</sup> Y]-DOTATOC n=4 combined with [ <sup>177</sup> Lu]-DOTATATE (prospective)                                                  | N=9 HNPGs (n=4 solitary tumor, n=4 multiple tumors, n=1 metastatic disease) Genetic results not provided                                                                                                                                                      | 0%                | 0%                                                                                                                                                                                                                                                                                                                      | 100% (including 44% minor/minimal response)                      | -                                                                                                                                                                                                                                                                                           |
| Kolasinska-Cwikla et al., 2019 <sup>5</sup> | [ <sup>90</sup> Y]-DOTATATE (prospective) (3.3GBq/cycle and 9.9GBq cumulative)                                                            | N=13 (n=5 <i>SDHB</i> , n=8 <i>SDHD</i> ) (all progressive disease)                                                                                                                                                                                           | 0%                | 8% (6 months)                                                                                                                                                                                                                                                                                                           | 75% (6 months)                                                   | PFS/OS total 35/68 months ( <i>SDHB</i> subgroup 12/25 months, <i>SDHD</i> subgroup not reached/not reached)                                                                                                                                                                                |
| Taieb et al., 2019 <sup>6</sup>             | [ <sup>90</sup> Y]/[ <sup>177</sup> Lu]-DOTATATE                                                                                          | Meta-analysis from 13 studies n= 234 (n=166 (71%) with progressive disease), n=21 <i>SDHB</i> , n=24 <i>SDHD</i>                                                                                                                                              |                   |                                                                                                                                                                                                                                                                                                                         | Disease control rate (partial response plus stable disease): 90% |                                                                                                                                                                                                                                                                                             |
| Satapathy et al., 2019 <sup>7</sup>         | [ <sup>177</sup> Lu]/[ <sup>90</sup> Y]-DOTATATE, [ <sup>90</sup> Y]-DOTATOC                                                              | Meta-analysis from 12 studies: n= 201, n=22 <i>SDHB</i> , n=12 <i>SDHD</i>                                                                                                                                                                                    |                   | Overall response rate 25% (n=179)                                                                                                                                                                                                                                                                                       | Disease control rate 84% (n=151)                                 | -                                                                                                                                                                                                                                                                                           |
| Zovato et al., 2012 <sup>8</sup>            | [ <sup>177</sup> Lu]-DOTATATE                                                                                                             | N=4 PGLs (all with <i>SDHD</i> PV) (n=2 thoracic PGLs, n=2 HNPGs) (all progressive disease at baseline) (non-metastatic)                                                                                                                                      | 0%                | 50%                                                                                                                                                                                                                                                                                                                     | 50%                                                              | -                                                                                                                                                                                                                                                                                           |
| Jaiswal et al., 2020 <sup>9</sup>           | [ <sup>177</sup> Lu]-DOTATATE                                                                                                             | N=15 [n=4 PHEOs, n=4 sympathetic PGLs (n=1 <i>SDHB</i> ), n=5 HNPGs, n= 1 PHEO + sympathetic PGL, n=1 HNPG +                                                                                                                                                  | 0%                | 7%                                                                                                                                                                                                                                                                                                                      | 73%                                                              | PFS/OS not reached after 27 months; very good response of the <i>SDHD</i> -mutated HNPG                                                                                                                                                                                                     |

|                                         |                                                                                                                 | sympathetic PGL<br>( <i>SDHD</i> )<br>(not all progressive)                                                                                           |                                                          |                      |                         |                                                                                                                                             |
|-----------------------------------------|-----------------------------------------------------------------------------------------------------------------|-------------------------------------------------------------------------------------------------------------------------------------------------------|----------------------------------------------------------|----------------------|-------------------------|---------------------------------------------------------------------------------------------------------------------------------------------|
| Zandee et al., 2019 <sup>10</sup>       | <sup>177</sup> [Lu]-DOTATATE 7.4GBq x 4 but up to 11 cycles                                                     | N=30 (n=17 parasympathetic PGLs with n=11 <i>SDHD</i> , n=10 sympathetic PGLs with n=5 <i>SDHB</i> , n=3 PHEOs) (not all progressive)                 | 0%                                                       | 23%                  | 67%                     | PFS total 30 months, PFS in parasympathetic (65% <i>SDHD</i> ) PGLs/sympathetic PGLs (50% <i>SDHB</i> )/PHEOs 91/13/10 months, respectively |
| Van Essen et al., 2006 <sup>11</sup>    | [ <sup>177</sup> Lu] DOTATATE                                                                                   | N=12 (n=11 evaluable) (n=1 PHEO, n=5 HNPGLs, n=6 other PGLs) (not all progressive), genetics not provided                                             | 0%                                                       | 18% (2/11)           | 55% (5/11)              | TTP 11 and 15 months, respectively in 2 patients, median TTP to progression not reached in PGL patients                                     |
| Severi et al., 2021 <sup>12</sup>       | [ <sup>177</sup> Lu] DOTATATE (cumulative 24.4GBq) [ <sup>90</sup> Y] DOTATATE (cumulative 9.2 GBq) prospective | N=46 (n=16 no PV/n=20 <i>SDHB/SDHD</i> ) (n=16 sympathetic and n=30 parasympathetic). [may not have had progression]                                  | 0% overall<br>0% <sup>90</sup> Y<br>0% <sup>177</sup> Lu | 8.7%<br>8.3%<br>8.9% | 71.7%<br>66.7%<br>73.5% | OS 142 months, PFS not reached. <sup>90</sup> Y OS 92 months <sup>177</sup> Lu OS 143 months                                                |
| Forrer et al., 2008 <sup>13</sup>       | [ <sup>90</sup> Y] DOTATOC, 3 combined with [ <sup>177</sup> Lu] DOTATATE                                       | N=28 (n=9 PHEO, n=19 PGL) (all progressive disease at baseline) genetics not provided                                                                 | 0%                                                       | 7%                   | 64%                     | TTP 3 to > 42 months, median TTP 18+/- 14 (6-44) months                                                                                     |
| Kong et al., 2017 <sup>14</sup>         | [ <sup>177</sup> Lu]-DOTATATE, 9 combined with radiosensitizing chemotherapy                                    | N=20 (n=8 PHEO, n=5 HNPGLs, n=5 abd. PGLs, n=2 HN plus abd. PGLs) (n=7 <i>SDHB</i> , n=1 <i>SDHD</i> , n=2 no PV, n=10 unknown) (not all progressive) | 0%                                                       | 29%                  | 57%                     | PFS 39 months, OS not reached                                                                                                               |
| Pinato et al., 2016 <sup>15</sup>       | <sup>177</sup> [Lu]-DOTATATE                                                                                    | N=5 abd. PGLs (n=5 <i>SDHB</i> , no <i>SDHD</i> ) (all progressive disease at baseline)                                                               | 0%                                                       | 20%                  | 60%                     | PFS 17 (0-78) months/mean OS 53 months (median OS not reached)                                                                              |
| Yadav et al., 2019 <sup>16</sup>        | <sup>177</sup> [Lu]-DOTATATE plus capecitabine                                                                  | N=25 PGLs (not all progressive) genetics not provided                                                                                                 | 0%                                                       | 28%                  | 56%                     | PFS 32 months, OS not reached                                                                                                               |
| Vyakaranam et al., 2019 <sup>17</sup>   | <sup>177</sup> [Lu]-DOTATATE 7.4GBq x 4                                                                         | N=22 (n=11 sympathetic PGLs, n=2 HNPGLs, n=9 PHEOs) (n=4 <i>SDHB</i> , no <i>SDHD</i> , n=9 not tested) (not all disease progression)                 | 0%                                                       | 9%                   | 91%                     | PFS 21.6 months/OS 49.6 (Ki-67 > 15%: negative predictive factor for PFS/OS)                                                                |
| Hamiditabar et al., 2017 <sup>18</sup>  | <sup>177</sup> [Lu]-DOTATATE (prospective)                                                                      | N=5 [not reported if progressive], genetics not provided                                                                                              |                                                          |                      |                         | Disease control rate/stable disease 80% (n=4/5)                                                                                             |
| Garske-Roman et al., 2018 <sup>19</sup> | <sup>177</sup> [Lu]-DOTATATE (prospective)                                                                      | N=5 [not all progressive], genetics not provided                                                                                                      |                                                          |                      |                         | Disease control rate/stable disease 100% (n=5/5)<br>PFS 14 months, OS 37 months                                                             |

|                                          |                                                                           |                                                                                                                                                                                       |                                                                                                |                                                                                                  |                                                 |                                                                                     |
|------------------------------------------|---------------------------------------------------------------------------|---------------------------------------------------------------------------------------------------------------------------------------------------------------------------------------|------------------------------------------------------------------------------------------------|--------------------------------------------------------------------------------------------------|-------------------------------------------------|-------------------------------------------------------------------------------------|
| Demirci et al., 2018 <sup>20</sup>       | <sup>177</sup> [Lu]-DOTATATE                                              | N=12 [not reported if progressive], genetics not provided                                                                                                                             | 0%                                                                                             | 50%                                                                                              | 25%                                             | PFS (mean): 31.4 months<br>OS (mean): 51.8 months                                   |
| Parghane et al., 2020                    | [ <sup>177</sup> Lu] DOTATATE 5.5-7.4 GBq/cycle, mean 24.4 GBq cumulative | N=9 PGL (all MIBG neg), n=5 HNPGLs, n=4 other PGLs [not all progressive] genetics not provided                                                                                        | 0%                                                                                             | 11%                                                                                              | 56% (including 22% with minor/minimal response) | OS or PFS median not reached at 40 months, 63% PFS at 40 months/65% OS at 40 months |
| Roll et al., 2020                        | <sup>177</sup> [Lu]-DOTATATE                                              | N=7, n=1 <i>SDHB</i> , no <i>SDHD</i> [not all progressive]                                                                                                                           |                                                                                                | 57%                                                                                              | 43% (disease control rate 100%)                 |                                                                                     |
| Gonias et al., 2009 <sup>21</sup>        | [ <sup>131</sup> I]-MIBG (phase II, prospective)                          | N=50 (n=49 evaluable, n=15 PHEOs, n=34 PGLs), n=12 <i>SDHB</i> PV (predictive for partial or complete response), <i>SDHD</i> status not available (not stated if progressive disease) | 8%                                                                                             | 14%                                                                                              | 43%                                             | 5-year OS 64%, predictors of poor OS: Prior chemotherapy, female sex                |
| Fishbein et al., 2012 <sup>22</sup>      | EBRT and [ <sup>131</sup> I]-MIBG, retrospective                          | n=5 EBRT and I-131 MIBG. (n=3 <i>SDHB</i> , n=2 not tested, no known <i>SDHD</i> ) [not stated if progressive disease]                                                                | 0                                                                                              | 0                                                                                                | 0                                               | PFS <i>SDHB</i> 3.6-21.5 m<br>OS <i>SDHB</i> 17.7-23.5                              |
| Van Hulsteijn et al., 2014 <sup>23</sup> | [ <sup>131</sup> I]-MIBG                                                  | Meta-analysis from 17 studies: n= 243 (n=99 PHEOs, n=47 PGLs, n=2 HNPGLs), no <i>SDHD</i> , n=15 <i>SDHB</i> PV                                                                       | 3% [slightly larger pooled proportions of complete response for PGLs (4%) than for PHEOs (1%)] | 27% [slightly larger pooled proportions of partial response for PGLs (30%) than for PHEOs (28%)] | 52%                                             | PFS in 2 studies 23.1 and 28.5 months, respectively                                 |
| Loh et al., 1997 <sup>24</sup>           | [ <sup>131</sup> I]-MIBG                                                  | Meta-analysis n=116 (n=86 documented tumor site, n=66 PHEOs, n=18 PGLs, n=2 PHEO plus PGL) genetics not provided                                                                      | 4%                                                                                             | 26%                                                                                              | 57%                                             | OS responders/non-responders: 22/13 months                                          |
| Thorpe et al., 2020 <sup>25</sup>        | [ <sup>131</sup> I]-MIBG                                                  | N=125 (n=88 evaluable, n=73 PHEOs, n=52 PGLs), (all progressive) genetics not provided                                                                                                | 1%                                                                                             | 33%                                                                                              | 53%                                             | PFS 2 years, OS responders vs. non-responders 6.3/2.4 years                         |
| Wakabayashi et al., 2019 <sup>26</sup>   | [ <sup>131</sup> I]-MIBG (phase I, prospective)                           | N=20 (n=13 PHEOs, n=7 PGLs), best overall response for PGL: stable disease (not all disease progression) genetics not provided                                                        | 10%                                                                                            |                                                                                                  | 65%                                             | 6-months OS/PFS 100%/80%                                                            |
| Noto et al., 2018 <sup>27</sup>          | HSA [ <sup>131</sup> I]-MIBG (phase I, prospective)                       | N=21 (n=10 PHEOs, n=11 PGLs) (not all disease progression) genetics not provided                                                                                                      |                                                                                                | 19%                                                                                              | 61.9%                                           | 2-year OS 62%                                                                       |
| Pryma et al., 2019 <sup>28</sup>         | HSA [ <sup>131</sup> I]-MIBG (phase II, prospective)                      | N=68 (evaluable n=64) patients (n=53 PHEOs, n=21 PGLs) (not all disease progression) genetics not provided                                                                            | 0%                                                                                             | 23%                                                                                              | 69%                                             | OS 36.7 months: 18 months after one cycle / 44 months after two cycles              |
| Averbuch et al., 1988 <sup>29</sup>      | CVD chemotherapy (prospective)                                            | N=14 genetics not provided                                                                                                                                                            |                                                                                                | 57% (complete plus partial response)                                                             |                                                 | PFS 21 months (7 to >34 months)                                                     |
| Huang et al., 2008 <sup>30</sup>         | CVD chemotherapy (prospective)                                            | N=18 (n=3 <i>SDHB</i> , n=2 possible <i>SDHB</i> , n=4 <i>SDHB</i> or <i>SDHD</i> , n=1 <i>SDHD</i> )                                                                                 | 11%                                                                                            | 44%                                                                                              | 44% (including 16% with minor/minimal response) | OS responders/non-responders 3.8/1.8 years                                          |

|                                                          |                                                                                              |                                                                                                                                                                                                                                                |              |                                                                                                                                                             |                                                            |                                                                                                                                                  |
|----------------------------------------------------------|----------------------------------------------------------------------------------------------|------------------------------------------------------------------------------------------------------------------------------------------------------------------------------------------------------------------------------------------------|--------------|-------------------------------------------------------------------------------------------------------------------------------------------------------------|------------------------------------------------------------|--------------------------------------------------------------------------------------------------------------------------------------------------|
|                                                          |                                                                                              |                                                                                                                                                                                                                                                |              |                                                                                                                                                             | mal response)                                              |                                                                                                                                                  |
| Niemeijer et al., 2014 <sup>31</sup>                     | CVD chemotherapy                                                                             | Meta-analysis from 4 studies: n=50 (n=3 <i>SDHB</i> , n=2 possible <i>SDHB</i> , n=4 <i>SDHB</i> or <i>SDHD</i> , n=1 <i>SDHD</i> )                                                                                                            | 4% (0-11%)   | 37% (24-50%)                                                                                                                                                | 14% (0-24%)                                                | PFS in 2 studies 20 and 40 months, respectively                                                                                                  |
| Asai et al., 2017 <sup>32</sup>                          | CVD chemotherapy                                                                             | N=23 genetics not provided                                                                                                                                                                                                                     | 4%           | 22%                                                                                                                                                         | 22%                                                        | OS/PFS responders vs. non-responders 4.6 vs. 2 years/1.7 vs. 0.3 years, respectively                                                             |
| Deutschbein et al., 2015 <sup>33</sup>                   | CVD chemotherapy                                                                             | N=8 genetics not provided                                                                                                                                                                                                                      | 0%           | 25%                                                                                                                                                         | 38%                                                        | PFS 5.4 months (2.5-26.8 months)                                                                                                                 |
| Tanabe et al., 2013 <sup>34</sup>                        | CVD chemotherapy                                                                             | N=17 genetics not provided                                                                                                                                                                                                                     | 0%           | 24%                                                                                                                                                         | 47% (including 23% with minor/minimal response)            | PFS responders 40 months (31-60 months), 50% survival: Responders (n=8) 6 years, stable disease (n=4) 4 years, progressive disease (n=5) 3 years |
| Jawed et al., 2018 <sup>35</sup>                         | Prolonged CVD chemotherapy (median 20,5 cycles, 4-41 cycles)                                 | N=12 (all with <i>SDHB</i> PV, all metastatic), tumor shrinkage in all patients (12%-100% by RECIST)                                                                                                                                           | 16,7% (2/12) | 66.7% (8/12)                                                                                                                                                | 16,7% (2/12) (minor/minimal response)                      | OS/PFS 3.3/2.6 years (1190/930 days)                                                                                                             |
| Ayala-Ramirez et al., 2012 <sup>36</sup>                 | Different chemotherapy regimens                                                              | N=54 (n=52 evaluable, n=4 <i>SDHB</i> , n=1 <i>SDHC</i> , no known <i>SDHD</i> ) (all progressive disease at baseline), 100% of responders: schemes included cyclophosphamide and dacarbazine, 82% of responders: schemes included vincristine |              | 33% (17/52) symptomatic or morphological response, 25% (13/52) morphological response, none of the <i>SDHB</i> -mutated patients in the group of responders |                                                            | OS responders/non-responders 6.4/3.7 years                                                                                                       |
| Hadoux et al., 2014 <sup>37</sup>                        | Temozolomide monotherapy                                                                     | N=15 (n=14 evaluable) (n=10 with <i>SDHB</i> PV, no <i>SDHD</i> ), all metastatic, all responders <i>SDHB</i> -mutated                                                                                                                         | 0%           | 33% (5/14) (RECIST plus PERCIST)                                                                                                                            | 47% (7/14) (RECIST plus PERCIST)                           | PFS 13.3 months, significantly longer in patients with <i>SDHB</i> pathogenic variant (19.7 vs. 2.9 months)                                      |
| Tena et al., 2018 <sup>38</sup>                          | Metronomic low dose temozolomide plus high dose Lanreotide Autogel (pre-treated with CVD)    | N=2 (n=2 <i>SDHB</i> , no <i>SDHD</i> ) (case reports)                                                                                                                                                                                         | 0%           | 0%                                                                                                                                                          | 100%                                                       | OS (n=2) not reached, PFS 13 months (n=1), PFS not reached after 27 months (n=1)                                                                 |
| Baudin et al., 2021, (ESMO 2021, abstract) <sup>39</sup> | TKI sunitinib (FIRST-MAPP study), first randomized placebo-controlled clinical trial in PPGL | N=78 (50% PHEO, 50% PGL), all metastatic and progressive at baseline, 32% (n=22) <i>SDHB</i> : 33% (n=13) sunitinib group, 23% (n=9) placebo group, <i>SDHC</i> : 3% (n=1) sunitinib group, no <i>SDHD</i>                                     |              |                                                                                                                                                             | 35.9% (partial response or stable disease after 12 months) | PFS 8.9 months (sunitinib) vs. 3.6 (placebo), PFS 12 months: 35.9% sunitinib group vs. 18.9% placebo group                                       |
| O' Kane et al., 2019 <sup>40</sup>                       | TKI sunitinib, SNIPP (phase II, prospective),                                                | N=25 (n=14 PHEOs, n=11 PGLs, n=5 <i>SDHB</i> , n=1 <i>SDHA</i> ,                                                                                                                                                                               | 0%           | 13% (3/23) (2/3 <i>SDHA/B</i> PV) >                                                                                                                         | 70% (16/23) > 12 weeks                                     | PFS 13.4 months                                                                                                                                  |

|                                                                                                                    |                                                                                                                                                |                                                                                                                                |    |                                                                                                                                                                                              |                                                    |                                                                                                                                 |
|--------------------------------------------------------------------------------------------------------------------|------------------------------------------------------------------------------------------------------------------------------------------------|--------------------------------------------------------------------------------------------------------------------------------|----|----------------------------------------------------------------------------------------------------------------------------------------------------------------------------------------------|----------------------------------------------------|---------------------------------------------------------------------------------------------------------------------------------|
|                                                                                                                    | sunitinib 50 mg for 4 weeks, 2 weeks off treatment (50% requiring dose reduction)                                                              | n=1 <i>SDHC</i> , no known <i>SDHD</i> , n=23 evaluable) (all patients with <i>SDHx</i> PV partial response or stable disease) |    | 12 weeks/3 months                                                                                                                                                                            | (disease control rate after 24 weeks/6 months 61%) |                                                                                                                                 |
| Ayala-Ramirez et al., 2012 <sup>41</sup>                                                                           | TKI sunitinib (retrospective) (n=1 sunitinib plus rapamycin in reduced doses with PFS not reached)                                             | N=17 (n=14 evaluable, n=8 <i>SDHB</i> PV, no <i>SDHD</i> ), all metastatic, all rapidly progressive at baseline                | 0% | 21% (3/14) (1/3 <i>SDHB</i> PV) > 4 months                                                                                                                                                   | 36% (5/14) (4/5 <i>SDHB</i> PV) > 6 months         | PFS 4.1 months (62.5% (5/8) with stable disease or partial response <i>SDHB</i> carriers)                                       |
| Jimenez et al. 2017 (5 <sup>th</sup> International Symposium on Pheochromocytoma and Paraganglioma 2017, abstract) | TKI cabozantinib (phase II, prospective) 60/40/20 mg cabozantinib                                                                              | N=10 (n=5 <i>SDHB</i> PV, no <i>SDHD</i> )                                                                                     |    | 40% > 3 months, all <i>SDHB</i> -mutated PPGLs partial/minor response (partial/minor response > 3 months 90%, partial/minor response > 6 months 70%, partial/minor response > 12 months 30%) | 50% > 3 months, all minor response                 | PFS 11.1 months (0.9-28 months)                                                                                                 |
| NCT01967576 (completed, preliminary data)                                                                          | TKI axitinib (phase II, prospective), axitinib 5 mg 2x/d, 28-day-cycles                                                                        | N=14 (n=12 evaluable) genetics not provided                                                                                    | 0% | 41.7%                                                                                                                                                                                        | 41.7%                                              | PFS 7.7 months (3.3.-16.8 months)                                                                                               |
| Jasim et al., 2017 <sup>42</sup>                                                                                   | TKI pazopanib (phase II, prospective) cycle 1: 400 mg daily d 1-14, cycle 2: 800 mg daily d 1-14, and then cycle 2 +: 800 mg daily on all days | N=7 (6 evaluable) genetics not provided                                                                                        |    | 17% (1/6) over 2.4 years                                                                                                                                                                     |                                                    | PFS/OS 6.5/14.8 months                                                                                                          |
| Oh et al., 2012 <sup>43</sup>                                                                                      | MTORC1 inhibitor everolimus (phase II, prospective)                                                                                            | N=7 (n=5 PHEOs, n=2 PGLs) genetics not provided                                                                                | 0% | 0%                                                                                                                                                                                           | 71% (5/7)                                          | PFS 3.8 months                                                                                                                  |
| Druce et al., 2009 <sup>44</sup>                                                                                   | MTORC1 inhibitor everolimus (10 mg/d)                                                                                                          | N=4 (n=2 no <i>SDHx</i> PV, n=2 not tested, no known <i>SDHD</i> )                                                             | 0% | 0%                                                                                                                                                                                           | 25% (1/4) (stable disease for 3 months)            | PFS 3 months (n=1)                                                                                                              |
| Naing et al., 2020 <sup>45</sup>                                                                                   | Pembrolizumab (phase II, prospective)                                                                                                          | N=9 (n=8 evaluable) genetics not provided                                                                                      | 0% | 0%                                                                                                                                                                                           | 75%                                                | 27-weeks PFS 43%                                                                                                                |
| Jimenez et al., 2020 <sup>46</sup>                                                                                 | Pembrolizumab (phase II, prospective)                                                                                                          | N=11 (n=2 <i>SDHB</i> , n=1 <i>SDHD</i> )                                                                                      |    | 9%                                                                                                                                                                                           | 64% (≥ 4 months)                                   | PFS 5.7 months (4.37 months - not reached) (n=1 <i>SDHD</i> stable disease for 24 months, n=1 <i>SDHB</i> tumor shrinkage >30%) |

Reported minor/minimal response is included in “Stable disease”; For each study, it is indicated if HNPGL and *SDHD*- or *SDHB*-mutated tumors have been included and if data are given separately for this group, or if genetic data was not provided. *SDHx*: pathogenic germline variant in one of the genes encoding for the four subunits of the SDH enzyme. PV for pathogenic variant.

**Supplemental Table 3: Adverse effects of targeted internal radiotherapy**

|                                                                                                      |                                                                                                                                                                                                                                                                                                                                                                                                   |                                                                                                                                                                                         |
|------------------------------------------------------------------------------------------------------|---------------------------------------------------------------------------------------------------------------------------------------------------------------------------------------------------------------------------------------------------------------------------------------------------------------------------------------------------------------------------------------------------|-----------------------------------------------------------------------------------------------------------------------------------------------------------------------------------------|
| Conventional low-specific-activity (LSA) MIBG, high-dose (>12 mCi/kg), meta-analysis <sup>6,23</sup> | 87% grade 3/4 neutropenia (required growth factor), 83% grade 3/4 thrombocytopenia (required platelet transfusion), myelodysplastic syndrome 4% (especially together with chemotherapy), hypothyroidism (11-20%), acute respiratory distress syndrome, bronchiolitis obliterans, hypertension, hypogonadism, rarely: renal failure, hypertensive crisis (despite alpha-blockade), hepatotoxicity. |                                                                                                                                                                                         |
| Conventional low-specific-activity (LSA) MIBG, low-dose (149 mCi total dose) <sup>6</sup>            | well-tolerated, hypothyroidism (11-20%), hypogonadism                                                                                                                                                                                                                                                                                                                                             |                                                                                                                                                                                         |
| High-specific-activity (HSA) MIBG <sup>28</sup>                                                      | Prolonged myelosuppression, 90% hematologic adverse events - with grade 3/4 adverse events or other severe adverse events in 72% of patients, 25% required hematological supportive care, 19% hematologic toxicity serious adverse events, 3% lung embolism, 4% myelodysplastic syndrome, AML 1.5%, ALL 1.5%                                                                                      |                                                                                                                                                                                         |
| PRRT                                                                                                 | Adverse events in one meta-analysis (n=234): <sup>6</sup> Myelodysplastic syndrome (MDS) 1.4-2.2%, nephrotoxicity 0-1.5%, grade 3/4 hematologic toxicity 9.5-11.3%.                                                                                                                                                                                                                               | Adverse events in another meta-analysis (n=201) <sup>7</sup> : Nephrotoxicity 4%, grade 3/4 neutropenia, thrombocytopenia, lymphopenia in 3%, 9% and 11% of the patients, respectively. |
|                                                                                                      | Incidence for PRRT-related myelodysplastic syndrome from NET studies: 2%. <sup>47,48</sup>                                                                                                                                                                                                                                                                                                        |                                                                                                                                                                                         |

## References

1. Fatima N, Pollom E, Soltys S, Chang SD, Meola A. Stereotactic radiosurgery for head and neck paragangliomas: a systematic review and meta-analysis. *Neurosurg Rev* 2021; **44**(2): 741-52.
2. Nastos K, Cheung VTF, Toumpanakis C, et al. Peptide Receptor Radionuclide Treatment and (131)I-MIBG in the management of patients with metastatic/progressive pheochromocytomas and paragangliomas. *J Surg Oncol* 2017; **115**(4): 425-34.
3. Imhof A, Brunner P, Marincek N, et al. Response, survival, and long-term toxicity after therapy with the radiolabeled somatostatin analogue [90Y-DOTA]-TOC in metastasized neuroendocrine cancers. *J Clin Oncol* 2011; **29**(17): 2416-23.
4. Puranik AD, Kulkarni HR, Singh A, Baum RP. Peptide receptor radionuclide therapy with (90)Y/ (177)Lu-labelled peptides for inoperable head and neck paragangliomas (glomus tumours). *European Journal of Nuclear Medicine and Molecular Imaging* 2015; **42**(8): 1223-30.
5. Kolasinska-Cwikla A, Peczkowska M, Cwikla JB, et al. A Clinical Efficacy of PRRT in Patients with Advanced, Nonresectable, Paraganglioma-Pheochromocytoma, Related to SDHx Gene Mutation. *J Clin Med* 2019; **8**(7).
6. Taieb D, Jha A, Treglia G, Pacak K. Molecular imaging and radionuclide therapy of pheochromocytoma and paraganglioma in the era of genomic characterization of disease subgroups. *Endocr Relat Cancer* 2019; **26**(11): R627-R52.
7. Satapathy S, Mittal BR, Bhansali A. 'Peptide receptor radionuclide therapy in the management of advanced pheochromocytoma and paraganglioma: A systematic review and meta-analysis'. *Clin Endocrinol (Oxf)* 2019; **91**(6): 718-27.
8. Zovato S, Kumanova A, Dematte S, et al. Peptide receptor radionuclide therapy (PRRT) with 177Lu-DOTATATE in individuals with neck or mediastinal paraganglioma (PGL). *Horm Metab Res* 2012; **44**(5): 411-4.
9. Jaiswal SK, Sarathi V, Memon SS, et al. 177Lu-DOTATATE therapy in metastatic/inoperable pheochromocytoma-paraganglioma. *Endocr Connect* 2020; **9**(9): 864-73.
10. Zandee WT, Feelders RA, Smit Duijzentkunst DA, et al. Treatment of inoperable or metastatic paragangliomas and pheochromocytomas with peptide receptor radionuclide therapy using 177Lu-DOTATATE. *Eur J Endocrinol* 2019; **181**(1): 45-53.
11. van Essen M, Krenning EP, Kooij PP, et al. Effects of therapy with [177Lu-DOTA0, Tyr3]octreotate in patients with paraganglioma, meningioma, small cell lung carcinoma, and melanoma. *J Nucl Med* 2006; **47**(10): 1599-606.
12. Severi S, Bongiovanni A, Ferrara M, et al. Peptide receptor radionuclide therapy in patients with metastatic progressive pheochromocytoma and paraganglioma: long-term toxicity, efficacy and prognostic biomarker data of phase II clinical trials. *ESMO Open* 2021; **6**(4): 100171.
13. Forrer F, Riedweg I, Maecke HR, Mueller-Brand J. Radiolabeled DOTATOC in patients with advanced paraganglioma and pheochromocytoma. *Q J Nucl Med Mol Imaging* 2008; **52**(4): 334-40.
14. Kong G, Grozinsky-Glasberg S, Hofman MS, et al. Efficacy of Peptide Receptor Radionuclide Therapy for Functional Metastatic Paraganglioma and Pheochromocytoma. *J Clin Endocrinol Metab* 2017; **102**(9): 3278-87.
15. Pinato DJ, Black JR, Ramaswami R, Tan TM, Adjogatse D, Sharma R. Peptide receptor radionuclide therapy for metastatic paragangliomas. *Med Oncol* 2016; **33**(5): 47.
16. Yadav MP, Ballal S, Bal C. Concomitant (177)Lu-DOTATATE and capecitabine therapy in malignant paragangliomas. *EJNMMI Res* 2019; **9**(1): 13.

17. Vyakaranam AR, Crona J, Norlen O, et al. Favorable Outcome in Patients with Pheochromocytoma and Paraganglioma Treated with (177)Lu-DOTATATE. *Cancers (Basel)* 2019; **11**(7).
18. Hamiditabar M, Ali M, Roys J, et al. Peptide Receptor Radionuclide Therapy With 177Lu-Octreotate in Patients With Somatostatin Receptor Expressing Neuroendocrine Tumors: Six Years' Assessment. *Clin Nucl Med* 2017; **42**(6): 436-43.
19. Garske-Roman U, Sandstrom M, Fross Baron K, et al. Prospective observational study of (177)Lu-DOTA-octreotate therapy in 200 patients with advanced metastasized neuroendocrine tumours (NETs): feasibility and impact of a dosimetry-guided study protocol on outcome and toxicity. *Eur J Nucl Med Mol Imaging* 2018; **45**(6): 970-88.
20. Demirci E, Kabasakal L, Toklu T, et al. 177Lu-DOTATATE therapy in patients with neuroendocrine tumours including high-grade (WHO G3) neuroendocrine tumours: response to treatment and long-term survival update. *Nucl Med Commun* 2018; **39**(8): 789-96.
21. Gonias S, Goldsby R, Matthay KK, et al. Phase II study of high-dose [131I]metaiodobenzylguanidine therapy for patients with metastatic pheochromocytoma and paraganglioma. *J Clin Oncol* 2009; **27**(25): 4162-8.
22. Fishbein L, Bonner L, Torigian DA, et al. External beam radiation therapy (EBRT) for patients with malignant pheochromocytoma and non-head and -neck paraganglioma: combination with 131I-MIBG. *Horm Metab Res* 2012; **44**(5): 405-10.
23. van Hulsteijn LT, Niemeijer ND, Dekkers OM, Corssmit EP. (131)I-MIBG therapy for malignant paraganglioma and phaeochromocytoma: systematic review and meta-analysis. *Clin Endocrinol (Oxf)* 2014; **80**(4): 487-501.
24. Loh KC, Fitzgerald PA, Matthay KK, Yeo PP, Price DC. The treatment of malignant pheochromocytoma with iodine-131 metaiodobenzylguanidine (131I-MIBG): a comprehensive review of 116 reported patients. *J Endocrinol Invest* 1997; **20**(11): 648-58.
25. Thorpe MP, Kane A, Zhu J, Morse MA, Wong T, Borges-Neto S. Long-Term Outcomes of 125 Patients With Metastatic Pheochromocytoma or Paraganglioma Treated With 131-I MIBG. *J Clin Endocrinol Metab* 2020; **105**(3).
26. Wakabayashi H, Inaki A, Yoshimura K, et al. A phase I clinical trial for [(131)I]metaiodobenzylguanidine therapy in patients with refractory pheochromocytoma and paraganglioma. *Sci Rep* 2019; **9**(1): 7625.
27. Noto RB, Pryma DA, Jensen J, et al. Phase 1 Study of High-Specific-Activity I-131 MIBG for Metastatic and/or Recurrent Pheochromocytoma or Paraganglioma. *J Clin Endocrinol Metab* 2018; **103**(1): 213-20.
28. Pryma DA, Chin BB, Noto RB, et al. Efficacy and Safety of High-Specific-Activity (131)I-MIBG Therapy in Patients with Advanced Pheochromocytoma or Paraganglioma. *J Nucl Med* 2019; **60**(5): 623-30.
29. Averbuch SD, Steakley CS, Young RC, et al. Malignant pheochromocytoma: effective treatment with a combination of cyclophosphamide, vincristine, and dacarbazine. *Ann Intern Med* 1988; **109**(4): 267-73.
30. Huang H, Abraham J, Hung E, et al. Treatment of malignant pheochromocytoma/paraganglioma with cyclophosphamide, vincristine, and dacarbazine: recommendation from a 22-year follow-up of 18 patients. *Cancer* 2008; **113**(8): 2020-8.
31. Niemeijer ND, Alblas G, van Hulsteijn LT, Dekkers OM, Corssmit EP. Chemotherapy with cyclophosphamide, vincristine and dacarbazine for malignant paraganglioma and pheochromocytoma: systematic review and meta-analysis. *Clin Endocrinol (Oxf)* 2014; **81**(5): 642-51.
32. Asai S, Katabami T, Tsuiki M, Tanaka Y, Naruse M. Controlling Tumor Progression with Cyclophosphamide, Vincristine, and Dacarbazine Treatment Improves Survival in

Patients with Metastatic and Unresectable Malignant Pheochromocytomas/Paragangliomas. *Horm Cancer* 2017; **8**(2): 108-18.

33. Deutschbein T, Fassnacht M, Weismann D, Reincke M, Mann K, Petersenn S. Treatment of malignant pheochromocytoma with a combination of cyclophosphamide, vincristine and dacarbazine: own experience and overview of the contemporary literature. *Clin Endocrinol (Oxf)* 2015; **82**(1): 84-90.

34. Tanabe A, Naruse M, Nomura K, Tsuiki M, Tsumagari A, Ichihara A. Combination chemotherapy with cyclophosphamide, vincristine, and dacarbazine in patients with malignant pheochromocytoma and paraganglioma. *Horm Cancer* 2013; **4**(2): 103-10.

35. Jawed I, Velarde M, Darr R, et al. Continued Tumor Reduction of Metastatic Pheochromocytoma/Paraganglioma Harboring Succinate Dehydrogenase Subunit B Mutations with Cyclical Chemotherapy. *Cell Mol Neurobiol* 2018; **38**(5): 1099-106.

36. Ayala-Ramirez M, Feng L, Habra MA, et al. Clinical benefits of systemic chemotherapy for patients with metastatic pheochromocytomas or sympathetic extra-adrenal paragangliomas: insights from the largest single-institutional experience. *Cancer* 2012; **118**(11): 2804-12.

37. Hadoux J, Favier J, Scoazec JY, et al. SDHB mutations are associated with response to temozolomide in patients with metastatic pheochromocytoma or paraganglioma. *Int J Cancer* 2014; **135**(11): 2711-20.

38. Tena I, Gupta G, Tajahuerce M, et al. Successful Second-Line Metronomic Temozolomide in Metastatic Paraganglioma: Case Reports and Review of the Literature. *Clin Med Insights Oncol* 2018; **12**: 1179554918763367.

39. Baudin E, GOICHOT B., Berruti A., et al. First International Randomized Study in Malignant Progressive Pheochromocytoma and Paragangliomas (FIRSTMAPPP): An academic double-blind trial investigating sunitinib. *Annals of Oncology* 2021; **32** (suppl\_5): **S621-S625**. [10.1016/annonc/annonc700](https://doi.org/10.1016/annonc/annonc700).

40. O'Kane GM, Ezzat S, Joshua AM, et al. A phase 2 trial of sunitinib in patients with progressive paraganglioma or pheochromocytoma: the SNIPP trial. *Br J Cancer* 2019; **120**(12): 1113-9.

41. Ayala-Ramirez M, Chougnat CN, Habra MA, et al. Treatment with sunitinib for patients with progressive metastatic pheochromocytomas and sympathetic paragangliomas. *J Clin Endocrinol Metab* 2012; **97**(11): 4040-50.

42. Jasim S, Suman VJ, Jimenez C, et al. Phase II trial of pazopanib in advanced/progressive malignant pheochromocytoma and paraganglioma. *Endocrine* 2017; **57**(2): 220-5.

43. Oh DY, Kim TW, Park YS, et al. Phase 2 study of everolimus monotherapy in patients with nonfunctioning neuroendocrine tumors or pheochromocytomas/paragangliomas. *Cancer* 2012; **118**(24): 6162-70.

44. Druce MR, Kaltsas GA, Fraenkel M, Gross DJ, Grossman AB. Novel and evolving therapies in the treatment of malignant pheochromocytoma: experience with the mTOR inhibitor everolimus (RAD001). *Horm Metab Res* 2009; **41**(9): 697-702.

45. Naing A, Meric-Bernstam F, Stephen B, et al. Phase 2 study of pembrolizumab in patients with advanced rare cancers. *J Immunother Cancer* 2020; **8**(1).

46. Jimenez C, Subbiah V, Stephen B, et al. Phase II Clinical Trial of Pembrolizumab in Patients with Progressive Metastatic Pheochromocytomas and Paragangliomas. *Cancers (Basel)* 2020; **12**(8).

47. Bodei L, Kidd M, Paganelli G, et al. Long-term tolerability of PRRT in 807 patients with neuroendocrine tumours: the value and limitations of clinical factors. *Eur J Nucl Med Mol Imaging* 2015; **42**(1): 5-19.

48. Sabet A, Ezziddin K, Pape UF, et al. Long-term hematotoxicity after peptide receptor radionuclide therapy with <sup>177</sup>Lu-octreotate. *J Nucl Med* 2013; **54**(11): 1857-61.
